# Supplementary material for: The Overexpression of Four MiTFL1 Genes from Mango Delays the Flowering Time in Transgenic Arabidopsis
Source: Research Square preprint supplement (doi:10.21203/rs.3.rs-218595/v1), 2021-03-02
Supplement: Supplementary file 1 [file 3a4ff1e5a9d4d295001ab97c.xlsx]

## Sheet: Sheet1
The Overexpression of Four MiTFL1 Genes from Mango Delays the Flowering Time in Transgenic Arabidopsis
Yi-Han Wang*, Xin-Hua He*, Hai-Xia Yu, Xiao Mo, Yan Fan, Zhi-Yi Fan, Xiao-Jie Xie, Yuan Liu, Cong Luo** College of Agriculture, State Key Laboratory for Conservation and Utilization of Subtropical Agro-Bioresources, Guangxi University, Guangxi Nanning, 530004 *These authors contributed equally to this work. **Corresponding author: Cong Luo, 22003luocong@163.com Yi-Han Wang*, Xin-Hua He*, Hai-Xia …
Supplementary Table.1 Primers used in this study.
Primer ID	Primer sequences (5'-3')	Primer purpose
QTFL1-1u	GAGATGTTCTTGATTCTTTCTCT	Full-length clone primers
QTFL1-1d	GTTAGCGTCTTCTAGCTGCAG
QTFL1-2u	ATGGCAAGAATGCCATCAGATCC
QTFL1-2d	TCAGCGCCTTCTTGCGGCTG
QTFL1-3u	ATGTCAAGAATGTCGGAGCCAC
QTFL1-3d	TCATCTTCTTCTGGCAGCCGT
QTFL1-4u	GTCACACACAGTTGATCATC
QTFL1-4d	CTTCATCTTCTTCTTGCAGCA
AUP1	GGCCACGCGTCGACTAGTAC(T)18	Reverse Transcription
35SF	GACGCACAATCCCACTATCCTT	Overexpressing vector detection
M13R	CAGGAAACAGCTATGAC	Vector detection of PMD18-T
M13F	TGTAAAACGACGGCCAGT
qTFL1-1u	GATGTTCTTGATTCTTTCTCT	qRT-PCR primers for mango
qTFL1-1d	TAGGTCTGAAGGAAACTGTG
qTFL1-2u	GATGTTGTTGATTGTTGTGAT
qTFL1-2d	CAACCTTAGGTTTCACAGTC
qTFL1-3u	GAGAGTGGTTGGTGATGTGG
qTFL1-3d	GGCAGCTCTCATATCTTCT
qTFL1-4u	GAAGATGACTGTGACTTATAGC
qTFL1-4d	CAATGTGTAGGCAGCTCTCAAG
AtActin2F	GCAGAGCGGGAAATTGTAAG	qRT-PCR primers for transgenic Arabidopsis
AtActin2R	GTACAGATCCTTCCTGATATCC
AtAP1-F	CACCAAATCCAGCATCCTTAC
AtAP1-R	GTTCGAGATCATTCCTCCTCA
AtFD-F	GATTCCACCACGGTCACTGTTC
AtFD-R	AGAGCCTCGAAAGAGGTGTTGA
AtFTu	CTTGGCAGGCAAACAGTGTATGCAC
AtFTd	GCCACTCTCCCTCTGACAATTGTAGA
MiTFL1-1u	AGTCTGTAATGGCCATGAGCT
MiTFL1-1d	AGTTCCCTCCCAAATGTGACA
MiTFL1-2u	TGGCCATGAGCTGTTTCCAT
MiTFL1-2d	GCTCCCTCAAGTATGGGTCAC
MiTFL1-2d	GCTCCCTCAAGTATGGGTCAC
MiTFL1-3u	AGCTTACGCCTGCTGTCATT
MiTFL1-3/4d	CCACCGGCTTTGGAATCTCA
pGBKT7-F	ATCGCCGGAATTTGTAATACG	Vector detection of Y2H
pGBKT7-R	CCCCAAGGGGTTATGCTAGTT
pGADT7-F	GGAGTACCCATACGACGTACC
pGADT7-R	TATCTACGATTCATCTGCAGCTC
