# Supplementary material for: The Overexpression of Four MiTFL1 Genes from Mango Delays the Flowering Time in Transgenic Arabidopsis
Source: Research Square preprint supplement (doi:10.21203/rs.3.rs-218595/v1), 2021-03-02

**The Overexpression ofFour *MiTFL1* Genes from Mango Delays the Flowering Time in Transgenic *Arabidopsis***

Yi-Han Wang*, Xin-Hua He*, Hai-Xia Yu, Xiao Mo, Yan Fan, Zhi-Yi Fan, Xiao-Jie Xie, Yuan Liu, Cong Luo**

*College of Agriculture, State Key Laboratory for Conservation and Utilization of Subtropical Agro-Bioresources, Guangxi University, Guangxi Nanning, 530004*

**These authors contributed equally to this work.*

***Corresponding author: Cong Luo, 22003luocong@163.com*

Supplement Figure 1

Source data for Figs. 5 and 6. (a) The red frame indicates the source data in Fig. S1a displayed for Fig. 5a-a1. (b) The source data in Fig. S1b displayed for Fig. 5b-b1. (c) The source data in Fig. S1c displayed for Fig. 6a-a1. (d) The source data in Fig. S1d displayed for Figs. 6b-b1.


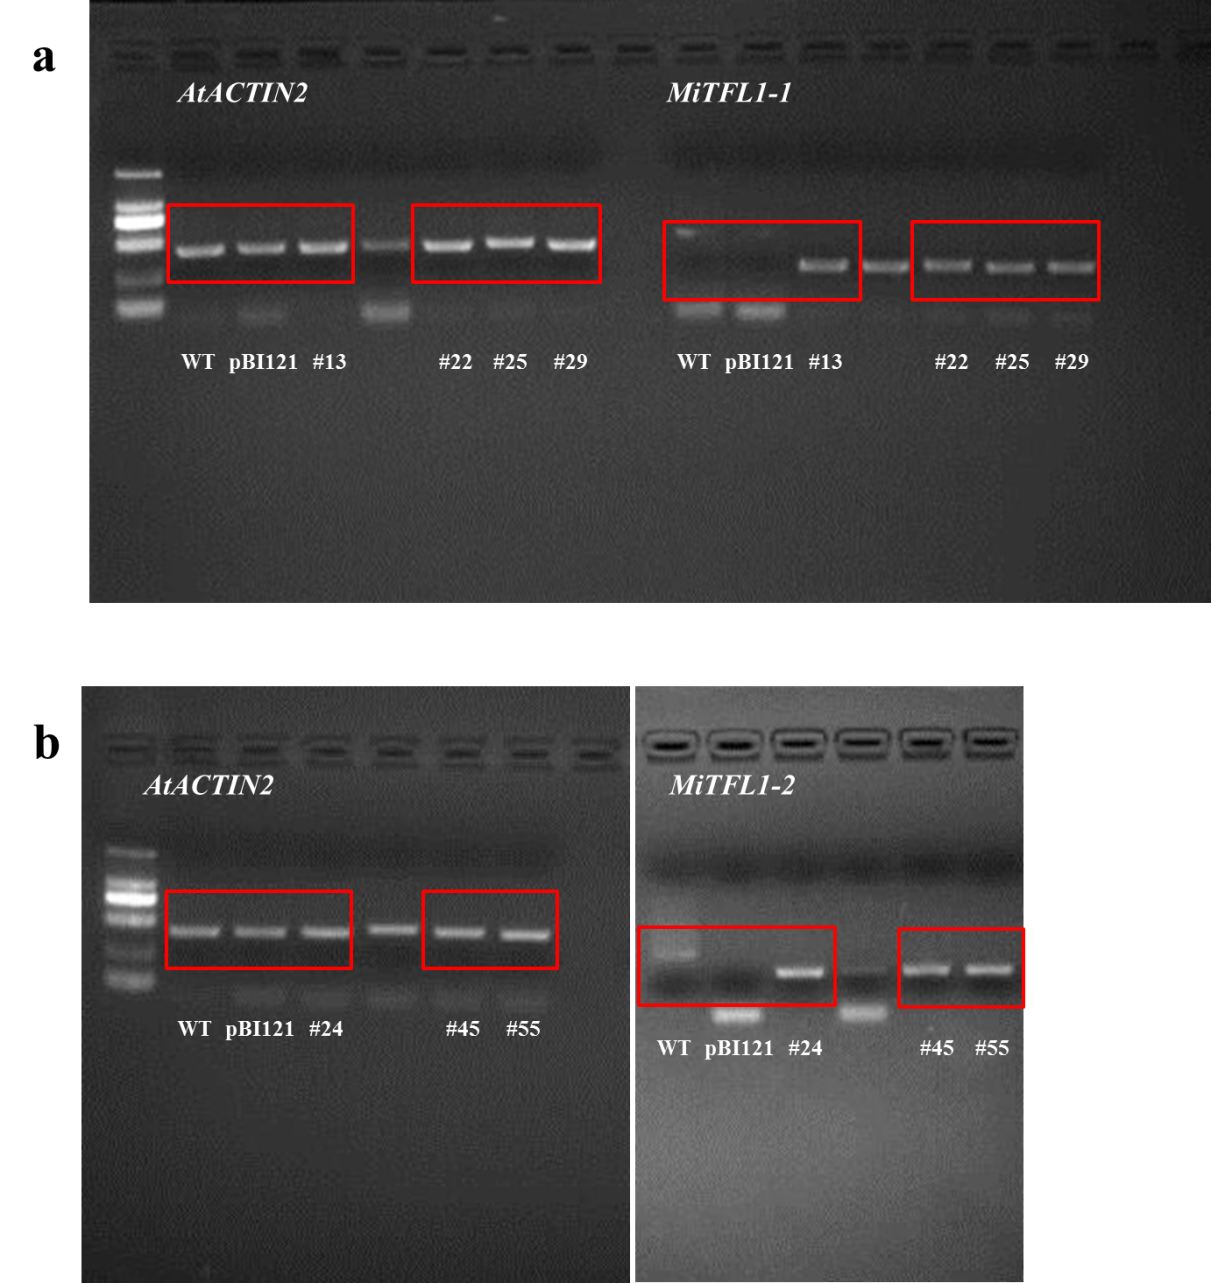


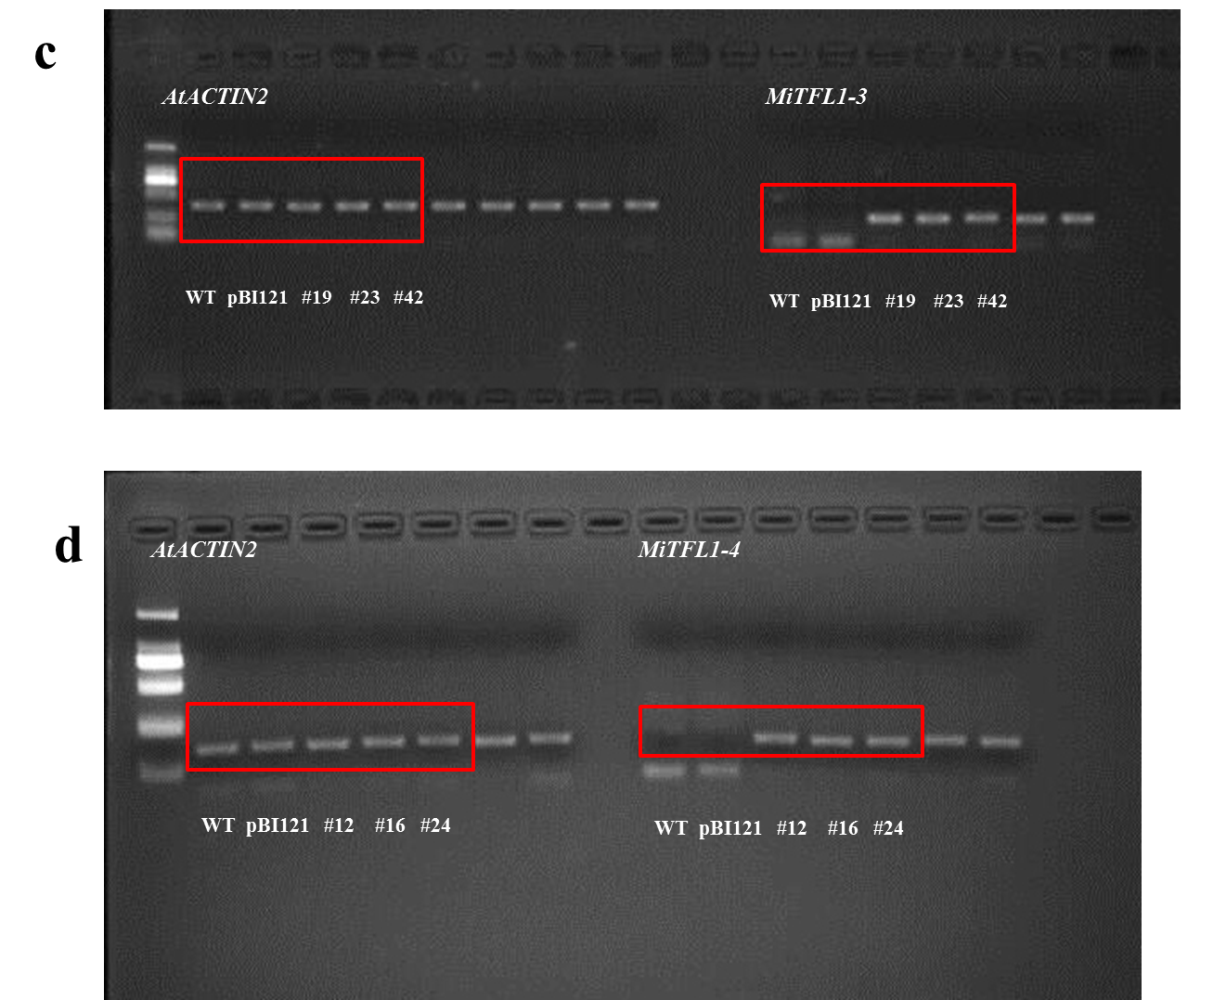

Supplement: Supplementary file 2 [file db4cd1d5232b921fb074ead9.docx]
